# Supplementary material for: Quartz crystal microbalance for telomerase sensing based on gold nanoparticle induced signal amplification
Source: Royal Society of Chemistry journal article supplement (doi:10.1039/c9cc02610j), 2019-01-01
Supplement: c9cc02610j1.pdf [file c9cc02610j1.pdf]

**Electronic Supporting Information**

**Quartz crystal microbalance for telomerase sensing based on gold nanoparticles  
induced signal amplification**

Haitang Yang<sup>a</sup>, Ying Li, Dingzhong Wang<sup>b</sup>, Yong Liu<sup>c</sup>, Wei Wei<sup>a,\*</sup>, Yuanjian Zhang<sup>a</sup>,  
Songqin Liu<sup>a</sup>, Peng Li<sup>b,\*</sup>

6

<sup>a</sup> Jiangsu Engineering Laboratory of Smart Carbon-Rich Materials and Device,  
Jiangsu Province Hi-Tech Key Laboratory for Bio-medical Research, School of  
Chemistry and Chemical Engineering, Southeast University, Nanjing, 211189, China

<sup>b</sup> Zhengzhou Tobacco Research Institute of CNTC, Zhengzhou 450001, China

<sup>c</sup> College of Chemistry and Chemical Engineering, Henan University, Kaifeng, 475004,  
PR China

\*Corresponding author. Tel.: 86-25-52090613; Fax: 86-25-52090618.

E-mail address: weiw@seu.edu.cn (W. Wei)

15

|    |                                                                                                  |
|----|--------------------------------------------------------------------------------------------------|
| 16 | <b>List of contents</b>                                                                          |
| 17 | <b>1. Chemicals and Materials.</b>                                                               |
| 18 | <b>2. Apparatus.</b>                                                                             |
| 19 | <b>3. Cell Culture and Telomerase Extraction.</b>                                                |
| 20 | <b>4. Preparation of GNPs-cDNA.</b>                                                              |
| 21 | <b>5. QCM Measured Procedure.</b>                                                                |
| 22 | <b>6. Atomic Force Microscope (AFM) Characterization.</b>                                        |
| 23 | <b>7. Calculation of the limit of detection.</b>                                                 |
| 24 | <b>Fig. S1</b> The optimization of the concentrations of TS primer and GNPs-cDNA.                |
| 25 | <b>Fig. S2</b> Telomerase activity detection extracts from various cell lines and selectivity of |
| 26 | the biosensor.                                                                                   |
| 27 | <b>Fig. S3</b> The inhibition effect of BIBR 1532 and curcumin on telomerase activity.           |
| 28 | <b>Table S1</b> Sequences of oligonucleotides used in this study.                                |
| 29 | <b>Table S2</b> Comparison of analytical performance of various methods for determination        |
| 30 | of telomerase activity.                                                                          |
| 31 |                                                                                                  |

32 **1. Chemicals and Materials.** Bis(p-sulfonatophenyl)phenylphosphine dihydrate  
33 dipotassium salt (BSPP) was purchased from Sigma-Aldrich Co. Ltd. (St. Louis, MO)  
34 Tris(2-carboxyethyl)phosphine (TCEP) were ordered from Sangon Biotech Co., Ltd.  
35 (Shanghai, China). 6-mercaptohexanol (MCH) was purchased from Aladdin Reagent  
36 Co., Ltd. (Shanghai, China). The oligonucleotides were synthesized and modified by  
37 Shanghai Sangon Biological Engineering Technology & Services Co. Ltd (Table S1).

38 In this study, the buffer solutions were employed as follows: telomerase extension  
39 reaction buffer (20 mM Tris-HCl, pH 8.3, 1.5 mM MgCl<sub>2</sub>, 1 mM EGTA, 0.63 mM KCl,  
40 0.005% (v/v) Tween 20). dNTPs was prepared by dissolving in extension reaction  
41 buffer. Telomerase solution consisted of telomerase originating from the specified  
42 number of cancer cells was prepared by dissolving in extension reaction buffer  
43 containing 1 mM dNTPs. The TS primer and GNPs-cDNA were prepared by dissolving  
44 in Tris-NaCl (10 mM Tris-HCl, pH 7.4, 0.1 M NaCl).

45 **2. Apparatus.** TEM images were collected on a transmission electron microscope  
46 (JEM-2010, Hitachi, Japan). Before TEM examination, 10μL of each sample was first  
47 dispersed onto a copper grid coated with the carbon film and was then dried in air.  
48 Piezoelectric measurements were performed with AT-cut gold coated quartz crystals  
49 with a resonance frequency of 5 MHz in flow through mode with a Q-Sense explorer  
50 QCM-D instrument (Biolin Scientific AB, Sweden). The maximum mass sensitivity of  
51 the instrument we use in liquid is 0.5 ng/cm<sup>2</sup> (5 pg/mm<sup>2</sup>). The oscillating frequency of  
52 the piezoelectric crystal decreases with the adsorption of a foreign substance on the  
53 surface. To calculate the mass uptakes ( $\Delta m$ ) the simplified relation between the shift in  
54 frequency ( $\Delta f$ ) and the mass of the adsorbed layer described by the Sauerbrey equation  
55 was used.  $\Delta m = -(C \cdot \Delta f)/n$ . Where  $C = 17.7 \text{ ng Hz}^{-1} \text{ cm}^{-2}$  for a 5 MHz quartz crystal.  
56  $n = 1, 3, 5, 7$  is the overtone number.

57 **3. Cell Culture and Telomerase Extraction.** Telomerase was extracted using the  
58 CHAPS method.<sup>1, 2</sup> Before telomerase extraction, A549 cells, HeLa cells, and MCF-7  
59 cells were seeded in DMEM supplemented with 10% FBS, penicillin (100 µg/mL), and  
60 streptomycin (100 µg/mL) in 5% CO<sub>2</sub>, 37 °C incubator. Three kinds of cells were  
61 collected in the exponential phase of growth, and the number of cells was calculated by  
62 flow cytometry. Then 1 million cells were dispensed in a 1.5 mL eppendorf tube,  
63 washed twice with ice-cold PBS solution by centrifugation at 1800 rpm for 5 min, after  
64 discarding the supernatant carefully, the cells were redispersed in 200 µL of ice-cold  
65 CHAPS lysis buffer. The cells were incubated for 30 min on ice and then centrifuged  
66 for 20 min (12 000 rpm, 4 °C). Finally, the cleared lysate which contained cell extracts  
67 corresponding to one million cells, was carefully transferred to a fresh tube, flash  
68 frozen, and stored at -80 °C before use.

69 For extraction of telomerase from urine samples, fresh urine (4 mL) was collected,  
70 centrifuged and washed with PBS solution. After 1800 rpm centrifugation for 5 min at  
71 4 °C, the precipitate was redispersed in 40 µL of ice-cold lysis buffer and then incubated  
72 on ice. After 12000 rpm centrifugation for 20 min at 4 °C, the supernatant was  
73 transferred and stored at -80 °C before analysis.

74 **4. Preparation of GNPs-cDNA.** Citrate-stabilized GNPs with diameters of 13 nm were  
75 synthesized according to the classic method.<sup>3</sup> First, all glasswares used in experiment  
76 were thoroughly washed with aqua regia (volume ratio 3:1, HCl/HNO<sub>3</sub>), rinsed in DI  
77 water, and oven-dried prior to use. Second, an aqueous solution of HAuCl<sub>4</sub>·4H<sub>2</sub>O (1  
78 mM, 50 mL) was brought to reflux with continuous stirring. Third, sodium citrate

79 solution (0.057 g sodium citrate + 5 ml H<sub>2</sub>O, freshly prepared) was quickly added,  
80 stirred, and kept boiling for another 15 min. The solution will turn from yellow to clear,  
81 to black, to purple to deep red during this period. After 15 min, turn heat off and allow  
82 the reaction to cool to room temperature. Finally, the AuNPs solution was stored in  
83 deep color bottles at 4 °C for further use. Concentration of the as-prepared AuNPs was  
84 determined using UV-vis spectroscopy.<sup>4</sup>

85       GNPs-cDNA was prepared following a literature procedure.<sup>5</sup> In order to increase  
86 the negative surface charge of the particle and consequently ensure that the GNPs  
87 modified with DNA were well-dispersed at high ionic strength. BSPP-protected GNPs  
88 were firstly prepared. Then the BSPP-protected GNPs were mixed with cDNA at a  
89 molar ratio of 1:5 for GNPs-cDNA, followed by rocking gently at room temperature for  
90 24 hours. Finally, the prepared GNPs-cDNA was further incubated with thiol-PEG-  
91 methyl for 2 h to passivate the GNPs surface. The sample was then centrifuged to  
92 remove uncoupled oligonucleotides.

93 **5. QCM Measured Procedure.** Prior to use, the gold-coated crystal chip (5 MHz, AT-  
94 cut) was immersed in a mixture of milliQ water, ammonia (25%) and hydrogen  
95 peroxide (30%) with a volume ratio of 5:1:1 for 5 min at 75°C, then the chips were  
96 rinsed with deionized water and dried by nitrogen gas before loading to measuring cells.  
97 In a typical experiment, after the frequency stabilization with Tris-NaCl as mobile  
98 phase, mixture of the TS primer (40 nM) and reducer TCEP (100 nM) was injected for  
99 60 min, then the chip was rinsed for 30 min to remove weakly bound TS primer. MCH  
100 (100 nM) flowed through the channels for 30 min to block the gold surface. Then the

chip was rinsed with Tris-NaCl to remove weakly bound MCH to frequency stabilization. Next, different concentrations of A549 cells were injected for 60min. After rinsing with Tris-NaCl for 50 min, the amplified response was obtained from the final injection of the gold nanoparticles immobilized cDNA (GNPs-cDNA). The running rate was 20  $\mu\text{L}/\text{min}$  set by an ismatec IPC tubing pump (Glattbrugg, Switzerland). To reduce the effect of system error, the frequency shift of the normalized ninth overtone which has the smallest noise was used to quantify.

For telomerase inhibitor evaluation, the experiments were conducted using the similar procedure except that telomerase was replaced with a mixture of different concentrations of BIBR 1532 or curcumin with a fixed concentration of 3000 A549 cells/mL. The inhibition efficiency was calculated based on the change of telomerase activity.

**6. Atomic Force Microscope (AFM) Characterization.** Freshly exfoliated mica was immersed in acetone (95%) containing 1% APTES for 5 min, washed with acetone and dried in the air. Then, it was immersed in 5% glutaraldehyde for 30 min, washed with water and then added with 1  $\mu\text{M}$  of  $\text{NH}_2\text{-TS}$ . 2.6% ice dissolved sodium borohydride was used for blocking. After washing with water, 80  $\mu\text{L}$  of extension reaction buffer containing 1 mM dNTPs and 7800 A549 cells/mL was added and incubated for 1.5 h. After washing, GNPs-cDNA was added and incubated for 30 min. Afterwards, the final prepared mica was rinsed with deionized water and dried for AFM characterization. The surface morphology was observed using a tapping mode.

**7. Calculation of the limit of detection.** The detection limit was calculated according

123 to the IUPAC recommendations. The equation was  $X_D = kS_b/m$ . Where  $S_b$  is the the  
124 standard deviation of ten blank solution;  $m$  is the slope of the linear equation of  $\Delta F$  to  
125 the concentration of A549 cells:  $\Delta F = -29.86 - 0.024C$ ,  $k$  is 3 when confidence level  
126 reached 99.86%.

127

128

Fig. S1

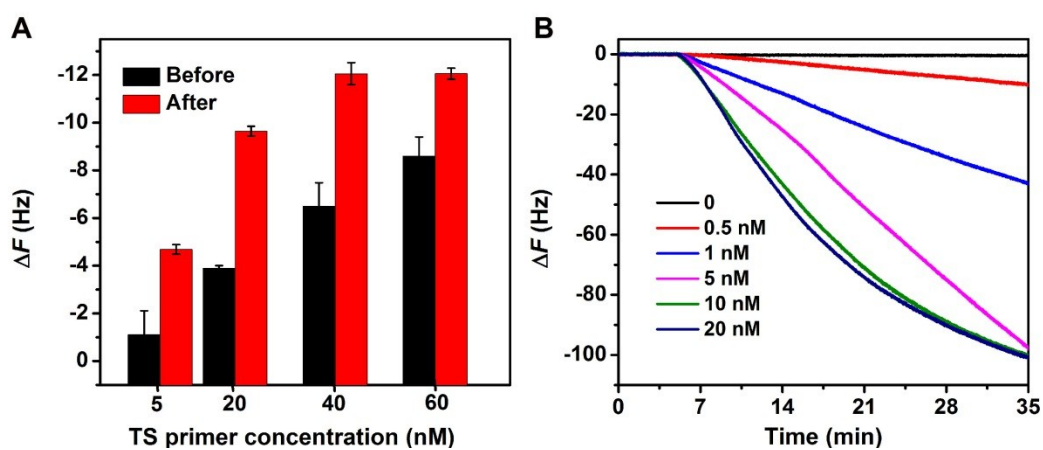

129

130 **Fig. S1** The optimization of the concentrations of TS primer (A) and GNPs-cDNA (B).

131 Black and red bars represent before and after telomerase extension reactions,

132 respectively. 3000 A549 cells/mL were used.

133

134

**Fig.S2**

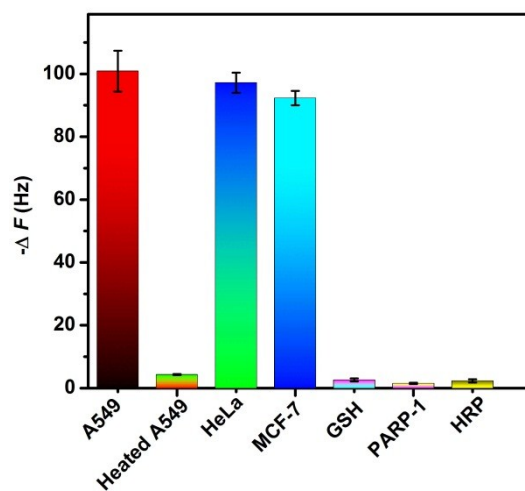

135

136 **Fig. S2** Telomerase activity detection extracts from various cell lines and selectivity of  
 137 the biosensor. Heated inactive A549 cells were used as negative control. Error bars  
 138 show the standard deviation of three experiments.

139

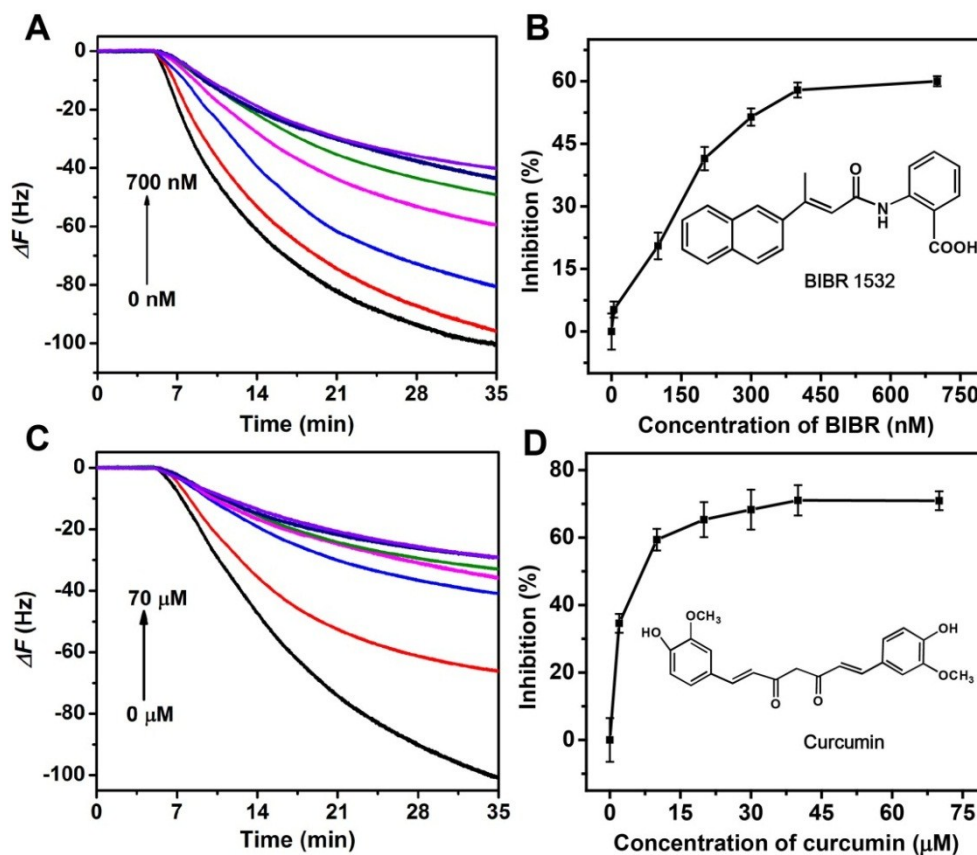

141

142 **Fig. S3** Frequency responses of the amplified QCM biosensor with the increasing  
 143 concentrations of Bibr 1532 (A) and curcumin (C). The inhibition effect of Bibr 1532 (B)  
 144 and curcumin (D) on telomerase activity. 3000 A549 cells were used. Error bars showed  
 145 the standard deviation of three experiments.

146

147

**Table S1** Sequences of oligonucleotides used in this study.

| Name                | Sequences (5' to 3')                                                         |
|---------------------|------------------------------------------------------------------------------|
| TS                  | SH(CH <sub>2</sub> ) <sub>6</sub> -TTTTTTTTTAATCCGTCGAGCAGAGTT               |
| NH <sub>2</sub> -TS | NH <sub>2</sub> (CH <sub>2</sub> ) <sub>6</sub> -TTTTTTTTTAATCCGTCGAGCAGAGTT |
| cDNA                | SH-(CH <sub>2</sub> ) <sub>6</sub> -CCCTAACCCCTAACCCCTAACCCCTAAACT           |

148

149

**Table S2** A comparison in sensitivity between the proposed method and other reported assays for the detection of telomerase activity.

| Method       | System                                                    | Detection range                   | Detection limit | Reference |
|--------------|-----------------------------------------------------------|-----------------------------------|-----------------|-----------|
| UV-vis       | Hemin-graphene conjugates                                 | 100 - 2300 cells/mL               | 60 cells/mL     | 6         |
| UV-Vis       | Etching of GNRs                                           | 200-15000 cells/mL                | 90 cells/mL     | 7         |
| Fluorescence | DNA tetrahedron-hairpin probe                             | 0-82000 cells/mL                  | 90 cells/mL     | 8         |
| Fluorescence | Molecular beacons                                         | 50-2000 cells/mL                  | 50 cells/mL     | 9         |
| EIS          | $\text{Fe}(\text{CN})_6^{3-}/\text{Fe}(\text{CN})_6^{4-}$ | $10^3$ - $10^5$ cells/mL          | 1000 cells/mL   | 10        |
| DPV          | Structure-switching DNA                                   | $10^2$ - $6 \times 10^4$ cells/mL | 100 cells/mL    | 11        |
| LSV          | Pt NPs encapsulated MOFs                                  | $5 \times 10^2$ - $10^7$ cells/mL | 100 cells/mL    | 12        |
| Glucometer   | DNA-capped MSNs                                           | 100-5000 cells/mL                 | 80 cells/mL     | 13        |
| SERS         | Nanogap-rich Au nanowire                                  | $0$ - $10^4$ cells/mL             | 0.2 cells/mL    | 14        |
| SERS         | TEC-SERS                                                  | 1-10000 cells/mL                  | 1 cells/mL      | 15        |
| QCM          | GNPs                                                      | 100-7800 cells/mL                 | 37 cells/mL     | This work |

154 **References**

- 155 1 X. Liu, M. Wei, Y. Liu, B. Lv, W. Wei, Y. Zhang and S. Liu, *Anal. Chem.*, 2016, **88**,  
156 8107-8114.
- 157 2 Y. Liu, M. Wei, X. Liu, W. Wei, H. Zhao, Y. Zhang and S. Liu, *Chem. Commun.*,  
158 2016, **52**, 1796-1799.
- 159 3 H. D. Hill and C. A. Mirkin, *Nature protocols*, 2006, **1**, 324-336.
- 160 4 W. Haiss, N. T. K. Thanh, J. Aveyard and D. G. Fernig, *Anal. Chem.*, 2007, **79**, 4215-  
161 4221.
- 162 5 Y. Liu, M. Wei, L. Zhang, W. Wei, Y. Zhang and S. Liu, *Chem. Commun.*, 2015, **51**,  
163 14350-14353.
- 164 6 X. Xu, M. Wei, Y. Liu, X. Liu, W. Wei, Y. Zhang and S. Liu, *Biosen. Bioelectron.*,  
165 2017, **87**, 600-606.
- 166 7 H. Yang, A. Liu, M. Wei, Y. Liu, B. Lv, W. Wei, Y. Zhang and S. Liu, *Anal. Chem.*,  
167 2017, **89**, 12094-12100.
- 168 8 Q. M. Feng, M. J. Zhu, T. T. Zhang, J. J. Xu and H. Y. Chen, *Analyst*, 2016, **141**,  
169 2474-2480.
- 170 9 K. Li, L. Wang, X. Xu and W. Jiang, *Talanta*, 2017, **167**, 645-650.
- 171 10 W. Yang, X. Zhu, Q. Liu, Z. Lin, B. Qiu and G. Chen, *Chem. Commun.*, 2011, **47**,  
172 3129-3131.
- 173 11 Z. Yi, H.-B. Wang, K. Chen, Q. Gao, H. Tang, R.-Q. Yu and X. Chu, *Biosens.*  
174 *Bioelectron.*, 2014, **53**, 310-315.
- 175 12 P. Ling, J. Lei, L. Jia and H. Ju, *Chem. Commun.*, 2016, **52**, 1226-1229.

- 176 13 Y. Wang, M. Lu, J. Zhu and S. Tian, *J. Mater. Chem. B*, 2014, **2**, 5847-5853.
- 177 14 G. Eom, H. Kim, A. Hwang, H.-Y. Son, Y. Choi, J. Moon, D. Kim, M. Lee, E.-K.
- 178 Lim, J. Jeong, Y.-M. Huh, M.-K. Seo, T. Kang and B. Kim, *Adv. Funct. Mater*, 2017,
- 179 **27**, 1701832.
- 180 15 S. Zong, Z. Wang, H. Chen and Y. Cui, *Small*, 2013, **9**, 4215-4220.
